# Supplementary material for: Formation of banana phases in bent-shaped molecules with unusual bent angles as low as 60°
Source: Royal Society of Chemistry journal article supplement (doi:10.1039/b903545a), 2009-01-01
Supplement: b903545a.pdf [file b903545a.pdf]

## Supplementary data

### Formation of banana phases in bent-shaped molecules with unusual bent angle as low as 60°

Seng Kue Lee,\* Xiaodong Li, Sungmin Kang, Masatoshi Tokita and Junji Watanabe

*Department of Organic and Polymeric Materials, Tokyo Institute of Technology,*

*2-12-1 O-okayama, Meguro-ku, Tokyo 152-8552, Japan*

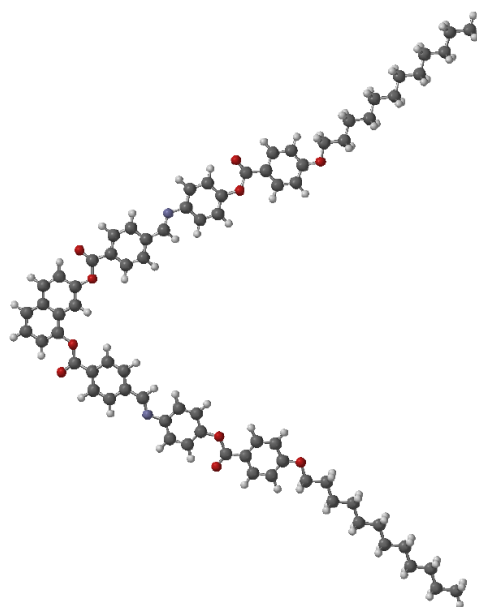

Figure S1. The all-*trans* conformation of N(1,7)-12
